# Supplementary material
Source: publisher site journal article supplement (https://www.dovepress.com/article/274354)
Supplement: Supplementary file 1 [file get_supplementary_file.php]

**Supplementary Table. Comparison between high and low inflammatory groups defined according to PLR and NLR**

|                                     | <b>Low PLR</b><br><b>(n=150)</b><br><b>(n,%)</b> | <b>High PLR</b><br><b>(n=117)</b><br><b>(n,%)</b> | <i>p-value</i> | <b>Low NLR</b><br><b>(n=156)</b><br><b>(n,%)</b> | <b>High NLR</b><br><b>(n=121)</b><br><b>(n,%)</b> | <i>p-value</i> | <b>Low CRP</b><br><b>(n=80)</b><br><b>(n,%)</b> | <b>High CRP</b><br><b>(n=80)</b><br><b>(n,%)</b> | <i>p-value</i> |
|-------------------------------------|--------------------------------------------------|---------------------------------------------------|----------------|--------------------------------------------------|---------------------------------------------------|----------------|-------------------------------------------------|--------------------------------------------------|----------------|
| <b>Sex</b>                          |                                                  |                                                   |                |                                                  |                                                   |                |                                                 |                                                  |                |
| <b>Female</b>                       | 73 (48.7)                                        | 48 (41.0)                                         | 0.213          | 79 (50.6)                                        | 45 (37.2)                                         | 0.026          | 36 (45.0)                                       | 27 (33.8)                                        | 0.145          |
| <b>Age (year)</b>                   | 64.1±11.2                                        | 65.2±11.0                                         | 0.410          | 64.2±11.3                                        | 65.7±11.1                                         | 0.285          | 65.8±12.3                                       | 65.3±11.3                                        | 0.783          |
| <b>Median survival time (95%CI)</b> | 29.3 [20.0-38.6]                                 | 11.8 [8.1-15.5]                                   | <0.001         | 26.0 [18.8-33.2]                                 | 10.6 [5.8-15.4]                                   | 0.001          | 28.3 [15.0-41.6]                                | 10.6 [8.0-13.2]                                  | <0.001         |
| <b>Stage</b>                        |                                                  |                                                   | 0.720          |                                                  |                                                   | 0.902          |                                                 |                                                  | -              |
| <b>IIIb</b>                         | 12 (8.0)                                         | 8 (6.8)                                           |                | 11 (7.1)                                         | 9 (7.4)                                           |                | 80 (100)                                        | 80 (100)                                         |                |
| <b>IV</b>                           | 138 (92.0)                                       | 109 (93.2)                                        |                | 145 (92.9)                                       | 112 (92.6)                                        |                | 0 (0)                                           | 0 (0)                                            |                |
| <b>BMI (kg/m<sup>2</sup>)</b>       | 23.8±3.5                                         | 22.8±3.3                                          | 0.024          | 24.0±3.5                                         | 22.5±3.3                                          | 0.001          | 23.2±3.3                                        | 22.9±3.3                                         | 0.653          |
| <b>EGFR mutation</b>                | (n=147)<br>50 (34.0)                             | (n=110)<br>41 (37.3)                              | 0.589          | (n=151)<br>58 (38.4)                             | (n=33)<br>34 (29.3)                               | 0.121          | (n=76)<br>35 (46.1)                             | (n=75)<br>24 (32.0)                              | 0.077          |
| <b>Ever smoker</b>                  | 68 (45.3)                                        | 54 (46.6)                                         | 0.843          | 70 (44.9)                                        | 57 (47.5)                                         | 0.664          | 35 (44.3)                                       | 43 (53.8)                                        | 0.234          |
| <b>ECOG</b>                         |                                                  |                                                   | 0.725          |                                                  |                                                   | 0.053          |                                                 |                                                  | 0.108          |
| <b>0-1</b>                          | 127 (84.7)                                       | 100 (86.2)                                        |                | 139 (89.1)                                       | 97 (80.8)                                         |                | 72 (91.1)                                       | 66 (82.5)                                        |                |
| <b>2-3</b>                          | 23 (15.3)                                        | 16 (13.8)                                         |                | 17 (10.9)                                        | 23 (19.2)                                         |                | 7 (8.9)                                         | 14 (17.5)                                        |                |

|                              |            |            |        |            |            |        |            |            |        |
|------------------------------|------------|------------|--------|------------|------------|--------|------------|------------|--------|
| <b>Pathology</b>             |            |            | 0.739  |            |            | 0.184  |            |            | 0.010  |
| <b>Non-squamous</b>          | 134 (89.3) | 103 (88.0) |        | 142 (91.0) | 104 (86.0) |        | 75 (93.8)  | 64 (80.0)  |        |
| <b>Squamous</b>              | 16 (10.7)  | 14 (12.0)  |        | 14 (9.0)   | 17 (14.0)  |        | 5 (6.3)    | 16 (20.0)  |        |
| <b>FEV1 (liter)</b>          | 2.1±1.7    | 1.8±0.7    | 0.062  | 2.1±1.7    | 1.8±0.8    | 0.060  | 2.1±2.3    | 1.7±0.7    | 0.114  |
| <b>FEV1 (% predicted)</b>    | 80.8±21.8  | 77.2±22.4  | 0.196  | 81.4±21.1  | 75.5±23.6  | 0.031  | 78.1±20.5  | 65.8±17.9  | <0.001 |
| <b>FVC (liter)</b>           | 2.7±1.0    | 2.7±2.8    | 0.993  | 2.6±1.0    | 2.7±2.7    | 0.736  | 2.5±0.7    | 2.6±3.3    | 0.649  |
| <b>FVC (% predicted)</b>     | 80.7±20.4  | 74.4±22.8  | 0.020  | 80.9±20.8  | 73.5±22.5  | 0.005  | 75.9±19.4  | 63.7±17.5  | <0.001 |
| <b>FEV1/FVC(% predicted)</b> | 73.5±11.0  | 75.1±10.2  | 0.215  | 73.9±10.6  | 74.0±11.7  | 0.962  | 74.6±11.1  | 74.5±12.4  | 0.963  |
| <b>NLR</b>                   | 2.6±1.3    | 5.6±3.4    | <0.001 | 2.2±0.7    | 6.5±4.1    | 0.001  | 3.5±2.7    | 5.3±4.0    | 0.001  |
| <b>PLR</b>                   | 130±32     | 266±72     | <0.001 | 143±50     | 250±86     | <0.001 | 192.5±96.0 | 216.8±77.7 | 0.091  |
| <b>CRP</b>                   | 3.56±0.68  | 3.66±0.52  | 0.915  | 2.37±0.52  | 5.11±0.63  | 0.001  | 0.51±0.48  | 6.97±6.03  | <0.001 |

**Abbreviations:** COPD; chronic obstructive pulmonary disease, CRP; c-reactive protein, BMI; body mass index, EGFR; epidermal growth factor receptor, ECOG; Eastern Cooperative Oncology Group, FEV1; forced expiratory volume in 1 s, FVC; forced vital capacity, DLCO; diffusing capacity of the lung for carbon monoxide, HR; hazard ratio, CI; confidence interval, NLR; neutrophil-lymphocyte ratio, PLR; platelet-lymphocyte ratio



# B

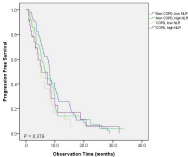

|                    |    |                |    |    |    |
|--------------------|----|----------------|----|----|----|
| Non-COPD, NLR low  | 54 | 44             | 34 | 24 | 14 |
| Non-COPD, NLR high | 51 | 41             | 31 | 21 | 11 |
| COPD, NLR low      | 25 | 15             | 5  | 0  | 0  |
| COPD, NLR high     | 25 | 15             | 5  | 0  | 0  |
|                    |    | Number at risk |    |    |    |

# C

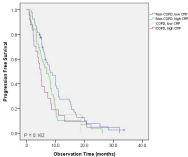

|                   |    |    |    |    |    |
|-------------------|----|----|----|----|----|
| Non-COPD, CRPlow  | 54 | 44 | 34 | 24 | 14 |
| Non-COPD, CRPhigh | 48 | 30 | 28 | 20 | 8  |
| COPD, CRPlow      | 28 | 20 | 8  | 8  | 8  |
| COPD, CRPhigh     | 28 | 20 | 8  | 8  | 8  |

Number at risk

## **Supplementary figure legends**

**Supp. Fig. 1A Comparison of progression free survival between the 4 COPD-PLR subgroups**

**Supp. Fig. 1B Comparison of progression free survival between the 4 COPD-NLR subgroups**

**Supp. Fig. 1C Comparison of progression free survival between the 4 COPD-CRP subgroups**
